# Supplementary material for: An Inhibitor of Grp94 Inhibits OxLDL-Induced Autophagy and Apoptosis in VECs and Stabilized Atherosclerotic Plaques
Source: PubMed Central journal article supplement (PMC8687133; doi:10.3389/fcvm.2021.757591), 2021-12-06
Supplement: Data_Sheet_1.pdf [file Data_Sheet_1.pdf]

*Supplementary Material*

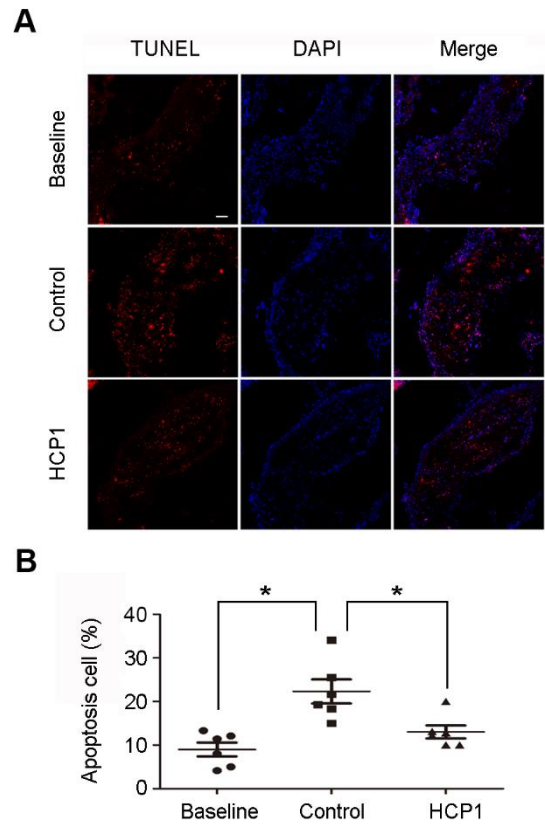

**Supplementary Figure 1.** HCP1 inhibited apoptosis in aortic root lesions of apoE<sup>-/-</sup> mice. (A) Sections from the mice aortic roots were labeled by TUNEL to detect apoptotic cells and counterstained with DAPI to detect nuclei. Scale bar, 50  $\mu$ m. (B) Quantification of TUNEL-positive

cells in the plaque area. Data are mean  $\pm$  SEM; \* $p < 0.05$ ;  $n=6$ . Statistical analyses were performed using one-way ANOVA.

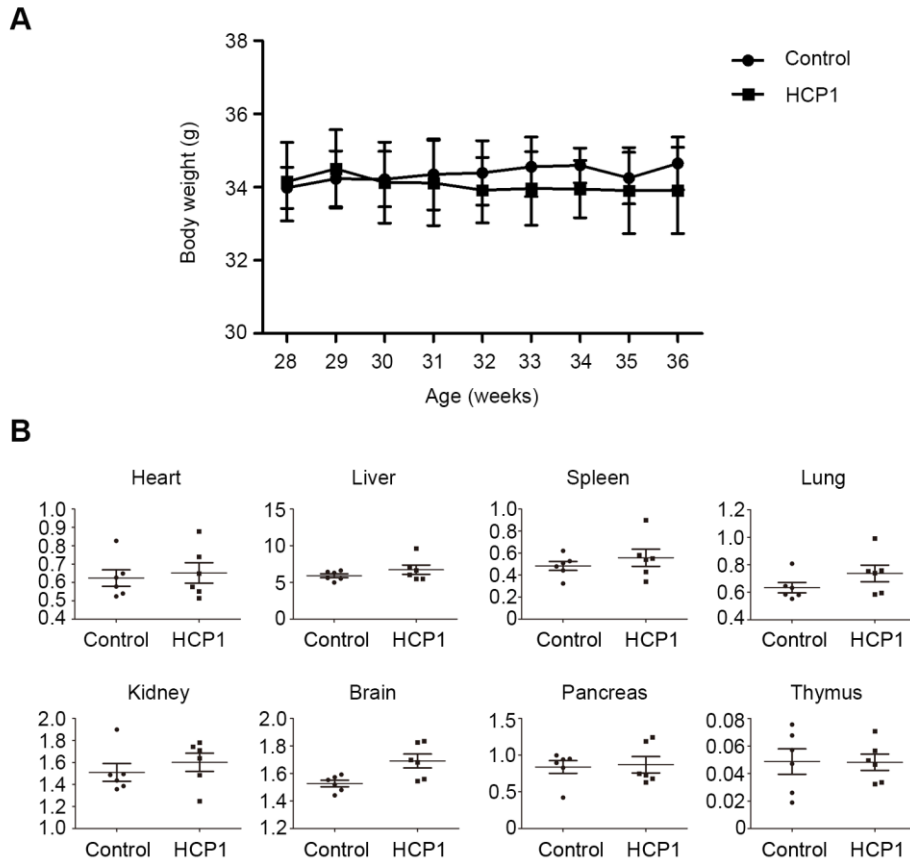

**Supplementary Figure 2.** Effects of HCP1 on body weight and organ coefficients in apoE<sup>-/-</sup> mice. (A) Body weight was measured every week during intraperitoneal injection period. (B) Organ coefficients of apoE<sup>-/-</sup> mice. Data are mean  $\pm$  SEM;  $n=6$ . Statistical analyses were performed using a two-tailed unpaired t-test.
